# Supplementary material for: Association of Tumor Necrosis Factor-α Inhibitors with Incident Dementia: Analysis Based on Population-Based Cohort Studies
Source: PubMed Central journal article supplement — Drugs Aging. 2024 Apr 12;41(5):423–30. doi: 10.1007/s40266-024-01112-1 (PMC11093812; doi:10.1007/s40266-024-01112-1), 2024-04-12
Supplement: 40266_2024_1112_MOESM1_ESM.pdf [file 40266_2024_1112_MOESM1_ESM.pdf]

# Association of Tumor Necrosis Factor- $\alpha$ Inhibitors with Incident Dementia

## Analysis based on Population-Based Cohort Studies

Submission to: Drugs & Aging

Saskia Berger<sup>1,2\*</sup>, Kristine F. Moseholm<sup>3\*</sup>, Emilie R. Hegelund<sup>3</sup>, Falko Tesch<sup>1</sup>, Minh Chau S. Nguyen<sup>3</sup>, Laust H. Mortensen<sup>3</sup>, Majken K. Jensen<sup>3,5</sup>, Jochen Schmitt<sup>1\*\*</sup>, Kenneth J. Mukamal<sup>4,5\*\*</sup>

1. Center for Evidence-Based Healthcare, Medizinische Fakultät der Technischen Universität Dresden, Dresden, Germany
2. Hospital Pharmacy, University Hospital Carl Gustav Carus, Technische Universität Dresden, Dresden, Germany
3. Department of Public Health, Section of Epidemiology, University of Copenhagen, Copenhagen, Denmark
4. Division of General Medicine, Beth Israel Deaconess Medical Center, Boston, MA, USA
5. Department of Nutrition, Harvard T.H. Chan School of Public Health, Boston, MA, USA

\*, \*\* Authors contributed equally to this work.

### Corresponding author:

Saskia Berger, Hospital Pharmacy, University Hospital Carl Gustav Carus, Technische Universität Dresden, Fetscherstrasse 74, 01307 Dresden, Germany. E-mail:

[Saskia.Berger@ukdd.de](mailto:Saskia.Berger@ukdd.de)

**Supplement Table 1. ATC- and ICD- codes**

| Generic drug name                                | ATC codes                              |
|--------------------------------------------------|----------------------------------------|
| <b>Anti-inflammatory biologicals/biosimilars</b> |                                        |
| <i>TNFi</i>                                      |                                        |
| Adalimumab                                       | L04AA17 (2005-2007)<br>L04AB04 (2008-) |
| Certolizumab pegol                               | L04AB05 (2008-)                        |
| Etanercept                                       | L04AA11 (2005-2007)<br>L04AB01 (2008-) |
| Golimumab                                        | L04AB06 (2010-)                        |
| Infliximab                                       | L04AA12 (2005-2007)<br>L04AB02 (2008-) |
| <i>Non TNF-<math>\alpha</math> biologics:</i>    |                                        |
| Abatacept                                        | L04AA24 (2008-)                        |
| Anakinra                                         | L04AC03                                |
| Canakinumab                                      | L04AC08 (2011-)                        |
| Ixekizumab                                       | L04AC13                                |
| Rituximab                                        | L01XC02 (2005-)                        |
| Sarilumab                                        | L04AC14                                |
| Secukinumab                                      | L04AC10                                |
| Tocilizumab                                      | L04AC07 (2010-)                        |
| Ustekinumab                                      | L04AC05 (2010-)                        |
| <i>Corticosteroids</i>                           |                                        |
| Hydrocortison                                    | H02BX                                  |
| Prednisolon                                      | H02AB                                  |
| <i>Low-potency immunosuppressant</i>             |                                        |
| Apremilast                                       | L04AA32                                |
| Chloroquin                                       | P01AB01 (2005-)                        |
| Sulfasalazin                                     | M01CX02 (2005-)<br>A07EC01 (2005-)     |
| <i>Intermediate-potency immunosuppressant</i>    |                                        |
| Baricitinib                                      | L04AA37 (2018-)                        |
| Ciclosporin                                      | L04AA01 (2005-2007)<br>L04AD01 (2008-) |
| Hydroxychloroquin                                | P01BA02 (2005-)                        |
| Leflunomide                                      | L04AA13 (2005-)                        |
| Mycophenolic acid                                | L04AA06                                |
| Tofacitinib                                      | L04AA29 (2014- )                       |
| <i>High-potency immunosuppressant</i>            |                                        |
| Azathioprin                                      | L04AX01 (2005-)                        |
| Methotrexate                                     | L01BA01<br>L04AX03<br>M01CX01          |
| <b>Anti-dementia drug</b>                        |                                        |
| Donepezil                                        | N06DA02                                |
| Anticholinesterases                              | N06DA03                                |
| Galantamine                                      | N06DA04                                |
| Memantine                                        | N06DX01                                |

| Diagnosis            | ICD-8 codes / ICD-10 codes      |
|----------------------|---------------------------------|
| Alzheimer's dementia | 290.10 / F00.0-00.9, G30.0-30.9 |
| Vascular dementia    | 293.09-19 / F01.0-01.9          |

|                                |                               |
|--------------------------------|-------------------------------|
| Frontotemporal dementia        | 290.11 / F02.0                |
| Dementia without specification | 290.09, 290.19 / F03.9, G31.9 |
| Other dementias                | 290.18 / G31.8                |

**Supplement Table 2. Differences in available information in DANBIO and AOK PLUS**

| Indicator                                      | DANBIO                                                                                                                                                                                                                                                                                                                        | AOK PLUS                                                                    |
|------------------------------------------------|-------------------------------------------------------------------------------------------------------------------------------------------------------------------------------------------------------------------------------------------------------------------------------------------------------------------------------|-----------------------------------------------------------------------------|
| <i>High-potency immunosuppressants</i>         | Azathioprin<br>Methotrexate                                                                                                                                                                                                                                                                                                   | Azathioprin<br>Methotrexate                                                 |
| <i>Intermediate-potency immunosuppressants</i> | Baricitinib<br>Ciclosporine<br>Hydroxychloroquin<br>Leflunomide<br>Mycophenolic acid<br>Tofacitinib                                                                                                                                                                                                                           | Ciclosporin<br>Leflunomide                                                  |
| <i>Low-potency immunosuppressants</i>          | Apremilast<br>Chloroquin<br>Sulfasalazine                                                                                                                                                                                                                                                                                     | Chloroquine<br>Hydroxychloroquine<br>Sulfasalazine                          |
| <i>Non-TNF-Biologics</i>                       | Abatacept<br>Anakinra<br>Canakinumab<br>Ixekizumab<br>Rituximab<br>Sarilumab<br>Secukinumab<br>Tocilizumab<br>Ustekinumab                                                                                                                                                                                                     | Abatacept<br>Canakinumab<br>Rituximab<br>Tocilizumab<br>Ustekinumab         |
| <i>TNFi</i>                                    | Adalimumab<br>Certolizumab pegol<br>Etanercept<br>Golimumab<br>Infliximab                                                                                                                                                                                                                                                     | Adalimumab<br>Certolizumab pegol<br>Etanercept<br>Golimumab<br>Infliximab   |
| <i>Time</i>                                    | Daily                                                                                                                                                                                                                                                                                                                         | Quarterly                                                                   |
| <i>Time frame</i>                              | 2000-2018                                                                                                                                                                                                                                                                                                                     | 2005-2014                                                                   |
| <i>Dementia</i>                                | Documented once with ICD-8 codes 290.09, 290.10, 290.11, 290.19, 290.18293.09-19 / ICD-10 codes F00/G30, F01, F02, F03, G31 and/or at least one prescription of an anti-dementia drug ATC codes: N06DA02, N06DA03, N06DA04, and N06DX01 in the Danish National Patient Register and the Danish National Prescription Registry | Documented once with ICD-10 codes F00/G30, F01, F02, F03 in outpatient care |

**Supplement Figure 1. Study flow diagram of inclusion and exclusion criteria in DANBIO**

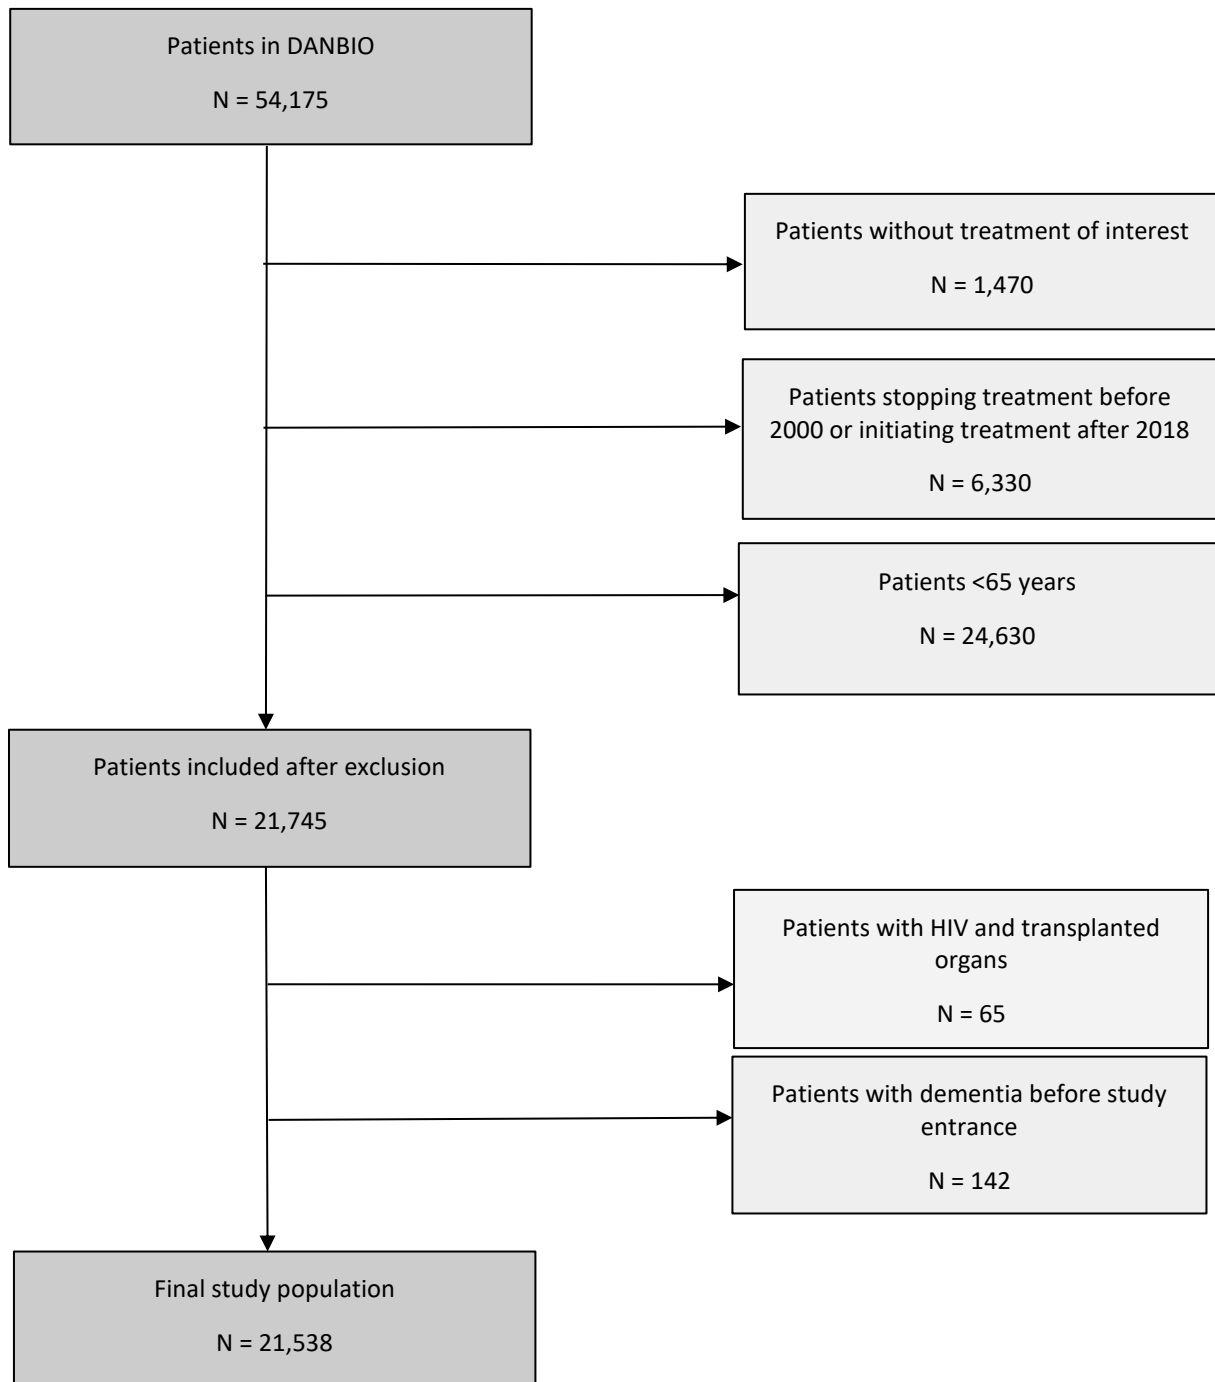

## Supplement Figure 2. Study flow diagram of inclusion and exclusion criteria in AOK PLUS

### PLUS

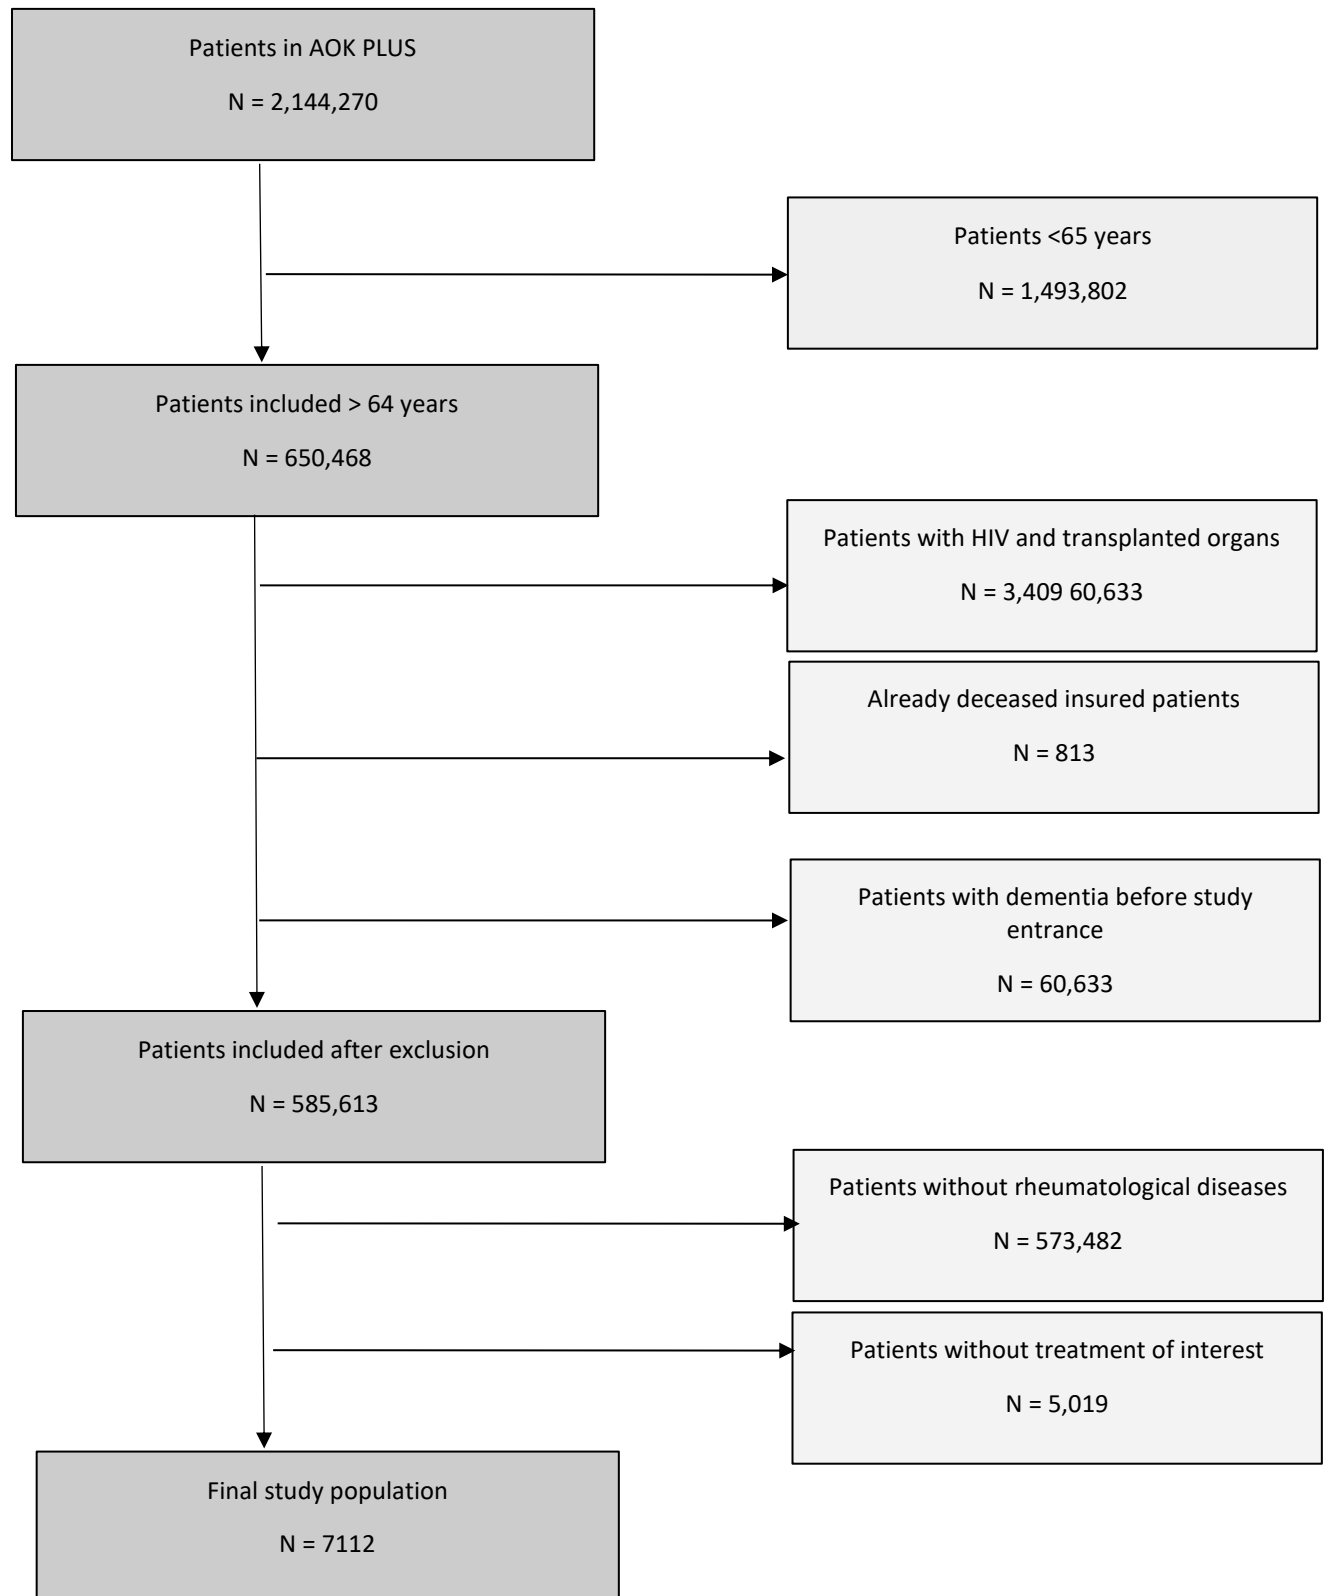

**Supplement Table 3. Association with risk of dementia for each of the (non-TNFi) anti-inflammatory drug groups compared to nonusers of each group\***

|                                        | HR (95% CI)       |                   |
|----------------------------------------|-------------------|-------------------|
|                                        | DANBIO            | AOK PLUS          |
| Non-TNF-biologics                      | 0.76 (0.53; 1.09) | 0.84 (0.62; 1.14) |
| Corticosteroids                        | 0.96 (0.83; 1.12) | 0.97 (0.77; 1.22) |
| Low-potency immunosuppressant          | 0.84 (0.72; 0.99) | 0.91 (0.77; 1.08) |
| Intermediate-potency immunosuppressant | 1.04 (0.77; 1.40) | 0.88 (0.74; 1.05) |
| High-potency immunosuppressant         | 1.02 (0.82; 1.26) | 0.91 (0.82; 1.01) |

\*Patients can be represented in more than one drug group, as they can use more than one anti-inflammatory drug.

**Supplement Table 4. Association with incident dementia for each of the six drug groups compared to the 'mixed control group'**\*

|                                        | HR (95% CI)       |                   |
|----------------------------------------|-------------------|-------------------|
|                                        | DANBIO            | AOK PLUS          |
| TNFi                                   | 0.73 (0.62; 0.86) | 0.68 (0.49; 0.95) |
| Non-TNF-biologics                      | 0.60 (0.43; 0.86) | 0.43 (0.33; 0.56) |
| Corticosteroids                        | 0.77 (0.68; 0.87) | 0.72 (0.71; 0.74) |
| Low-potency immunosuppressant          | 0.70 (0.61; 0.79) | 0.78 (0.68; 0.89) |
| Intermediate-potency immunosuppressant | 0.80 (0.60; 1.06) | 0.75 (0.64; 0.88) |
| High-potency immunosuppressant         | 0.77 (0.72; 0.83) | 0.76 (0.71; 0.82) |

\*The mixed reference group changes for each drug group comparison as it is represented by all individuals without use of the specific drug group exposure.
